# Supplementary material for: Fabrication of biocompatible free-standing nanopatterned films for primary neuronal cultures
Source: Royal Society of Chemistry journal article supplement (doi:10.1039/c4ra08361j), 2014-01-01
Supplement: c4ra08361j1.pdf [file c4ra08361j1.pdf]

### Electronic Supplementary Information

#### Fabrication of biocompatible free-standing nanopatterned films for primary neuronal cultures

F. Cesca, T. Limongi, A. Accardo, A. Rocchi, M. Orlando, V. Shalabaeva, E. Di Fabrizio and F. Benfenati

Supplementary Figure 1

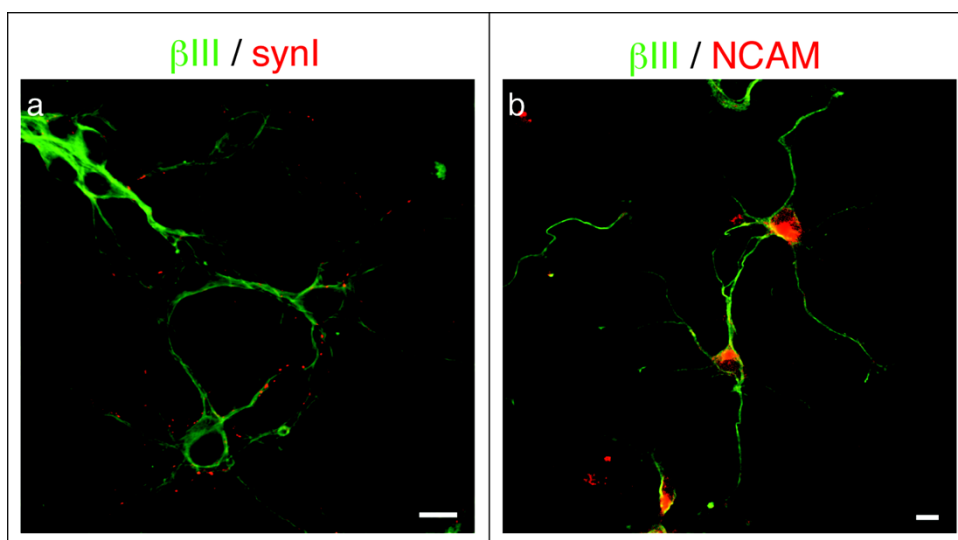

Confocal images of primary hippocampal cultures plated on flat PCL substrates. Neurons were grown for 7 days on the substrates, fixed and processed for confocal microscopy. The neuron-specific markers analysed are as follows:  $\beta$ III, neuronal class III  $\beta$ -tubulin (green channel); synI, synapsin I; NCAM, neural cell adhesion molecule (red channel). Neurons formed a sparse network, characterized by a low number of synaptic contacts (a) and by a limited NCAM-immunoreactivity, mostly localized around the cell bodies and the proximal neurites (b). Scale bars: 10  $\mu$ m.
